# Supplementary material
Source: Springer Nature journal article supplement (https://www.springermedizin.de/resource/supplementary/12993_2010_327_MOESM5_ESM.pdf/9617546)

Corticosterone (ng/ml)

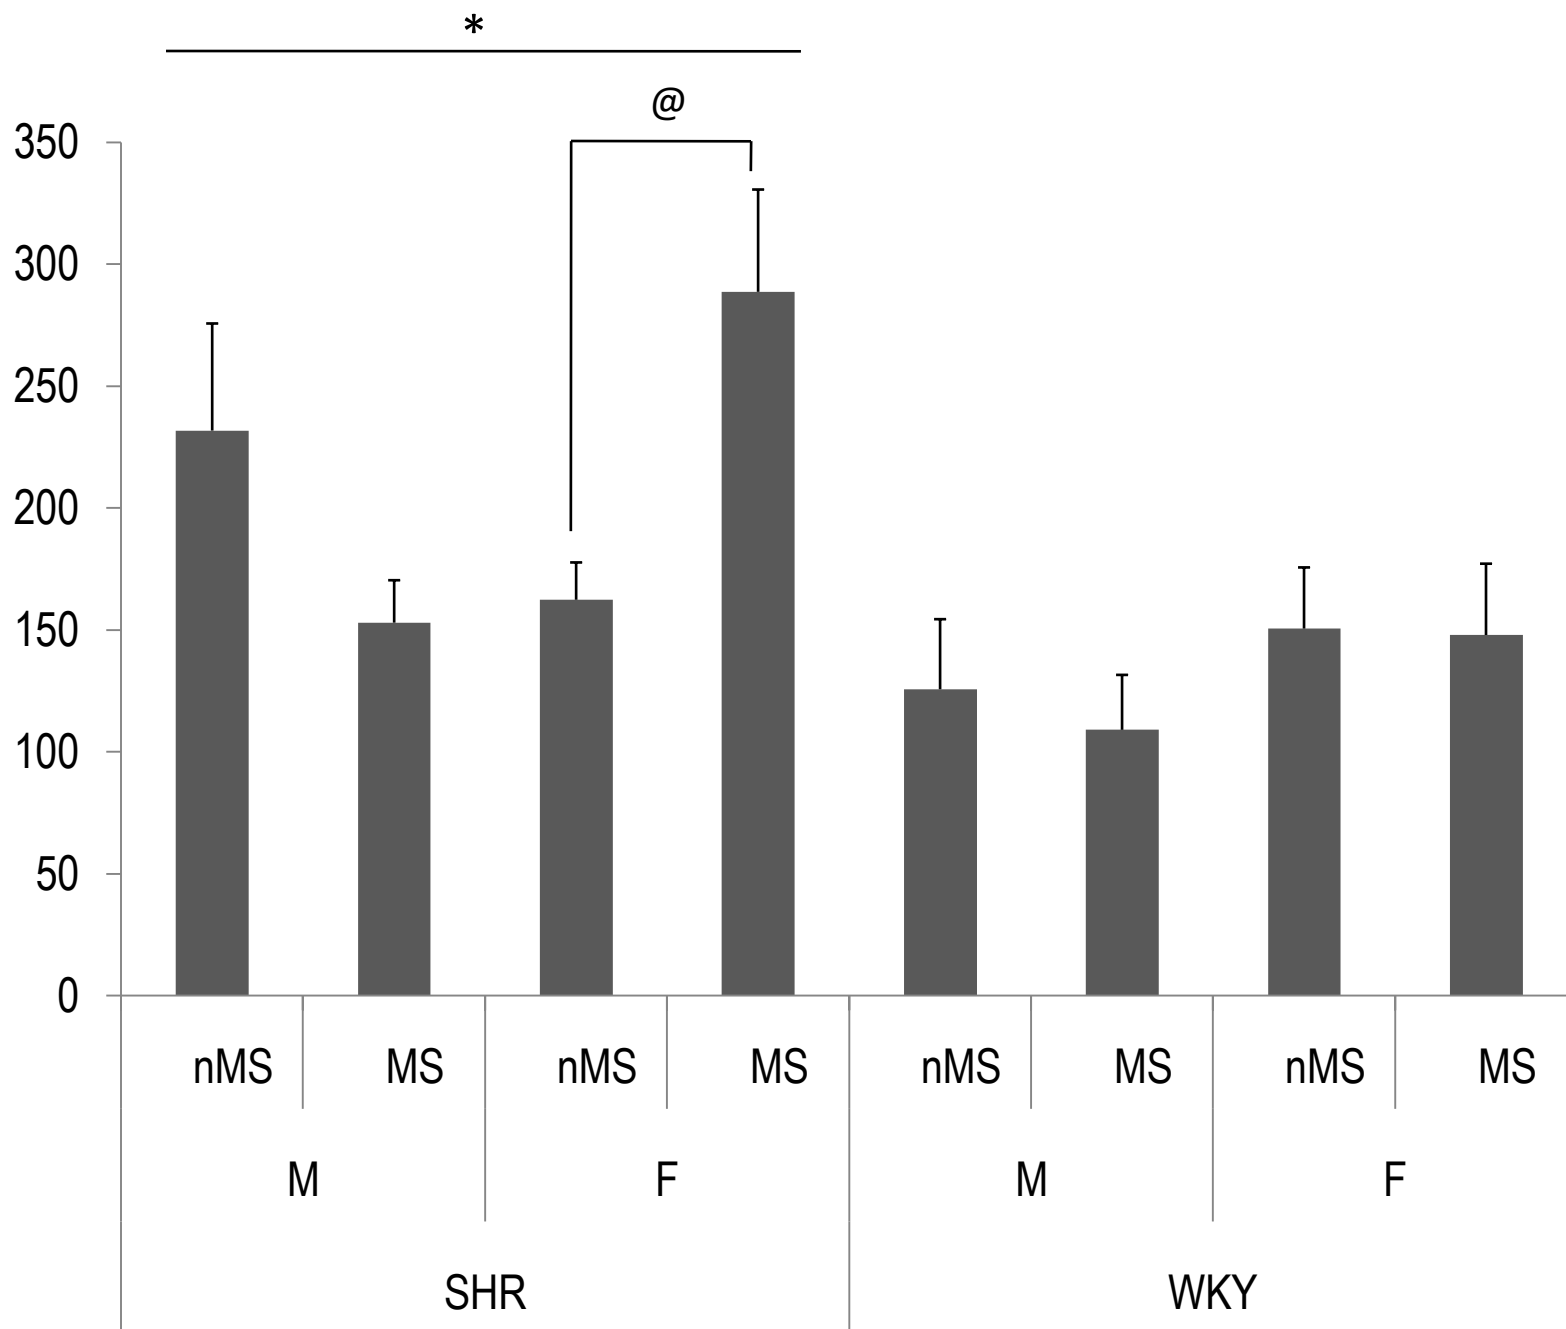

Supplement: MOESM5 [file 9617546]
